# Supplementary material
Source: PubMed Central journal article supplement (PMC10697210)
Supplement: NIHMS1933044-supplement-1.pdf [file NIHMS1933044-supplement-1.pdf]

## Supplemental Tables

Table S1. Adjusted Models for the Association of Regular Supplement Use and Incident Gastric Cancer, Stratified by Sex

|                         | Female Sex        |          | Male Sex         |          |
|-------------------------|-------------------|----------|------------------|----------|
|                         | HR (95% CI)       | P- Value | HR (95% CI)      | P- Value |
| Regular Supplement User | 0.90 (0.59-1.37)  | 0.62     | 0.71 (0.48-1.06) | 0.09     |
| Older age               | 1.08 (1.05-1.10)  |          | 1.08 (1.06-1.10) |          |
| Former Smoker           | 2.22 (1.38-3.56)  |          | 2.01 (1.08-3.71) |          |
| Current Smoker          | 1.46 (0.83- 2.56) |          | 2.69 (1.47-4.91) |          |
| Diagnosed with Diabetes | 1.33 (0.85- 2.08) |          | 1.45 (0.94-2.25) |          |

Table S2. Adjusted Models for the Association of Regular Supplement Use and Incident Gastric Cancer, Stratified by Race

|                         | Black            |         | White            |         |
|-------------------------|------------------|---------|------------------|---------|
|                         | HR (95% CI)      | P-value | HR (95% CI)      | P-value |
| Regular Supplement User | 0.78 (0.55-1.11) | 0.17    | 0.92 (0.53-1.60) | 0.77    |
| Older age               | 1.09 (1.07-1.11) |         | 1.05 (1.02-1.08) |         |
| Female sex              | 0.59 (0.42-0.84) |         | 0.51 (0.29-0.88) |         |
| Former Smoker           | 2.38 (1.50-3.77) |         | 1.30 (0.67-2.52) |         |
| Current Smoker          | 2.39 (1.49-3.83) |         | 1.27 (0.61-2.64) |         |
| Diagnosed with Diabetes | 1.25 (0.86-1.82) |         | 1.69 (0.92-3.10) |         |
